# Supplementary material for: Distribution Characteristics of Microplastics in Surface Seawater off the Yangtze River Estuary Section and Analysis of Ecological Risk Assessment
Source: MDPI journal article supplement (doi:10.3390/toxics11110889), 2023-10-30
Supplement: s1 [file s1]

## **Supplementary Materials**

# **Distribution Characteristics of Microplastics in Surface Seawater off the Yangtze River Estuary Section and Analysis of Ecological Risk Assessment**

**Xiao Ji <sup>1,2,+</sup>, Shuaishuai Yan <sup>1,+</sup>, Yanlong He <sup>1</sup> Haisheng He <sup>1</sup> and Hanqi Liu <sup>1,2,\*</sup>**

<sup>1</sup> East China Sea Ecological Center, MNR Shanghai 201206, China

<sup>2</sup> Key Laboratory of Marine Ecological Monitoring and Restoration Technology, Ministry of Natural Resources, Shanghai 201206, China

\* Correspondence: liuhanqi@ecs.mnr.gov.cn

+ These authors contributed equally to this work.

**Supplementary Material Table S1. Risk rank of polymers based on monomer toxicity**

| polymer                        | hazard index | Polymer monomers (wt.%)   |
|--------------------------------|--------------|---------------------------|
| polyether based flexible foam  | 13,844 (V)   | Propylene oxide (58 wt.%) |
| Polyacrylonitrile (PAN)        | 11,521 (V)   | Acrylonitrile (100 wt.%)  |
| Polyvinyl chloride (PVC)       | 10,551 (V)   | Vinyl chloride (50 wt.%)  |
| Styrene acrylonitrile (SAN)    | 2788 (V)     | Styrene (76 wt.%)         |
| High-impact polystyrene (HIPS) | 1628 (V)     | Styrene (92 wt.%)         |
| Polyacrylic acid (PAA)         | 230 (III)    | Acrylic acid (100 wt.%)   |
| Polystyrene (PS )              | 30 (II)      | Styrene (100 wt.%)        |
